# Supplementary material for: GC-MS metabolomics on PPARα-dependent exacerbation of colitis
Source: Royal Society of Chemistry journal article supplement (doi:10.1039/c5mb00048c), 2015-03-11
Supplement: c5mb00048c1.pdf [file c5mb00048c1.pdf]

## Supplemental Materials

### GC-MS metabolomics on PPAR $\alpha$ -dependent exacerbation of colitis

Xueqin Gu<sup>1,2</sup>, Yunlong Song<sup>1</sup>, Yifeng Chai<sup>1</sup>, Feng Lu<sup>1</sup>, Frank J. Gonzalez<sup>3</sup>,  
Guorong Fan<sup>1,\*</sup>, Yunpeng Qi<sup>1,2,\*</sup>

<sup>1</sup>School of Pharmacy, Second Military Medical University, Shanghai 200433, China

<sup>2</sup>Fujian University of Chinese Traditional Medicine, Fuzhou, Fujian 350122, China

<sup>3</sup>Laboratory of Metabolism, Center for Cancer Research, National Cancer Institute, National Institutes of Health, Bethesda, Maryland 20892, USA

#### Corresponding author:

Yunpeng Qi, Department of Pharmaceutical Analysis, School of Pharmacy, Second Military Medical University, Shanghai 200433, China.

E-mail: qiyunpeng@smmu.edu.cn; Fax: 86-21-81871265; Tel: 86-21-81871265.

Guorong Fan, Department of Pharmaceutical Analysis, School of Pharmacy, Second Military Medical University, Shanghai 200433, China.

E-mail: guorfan@outlook.com; Fax: 86-21-81871260; Tel: 86-21-81871260.

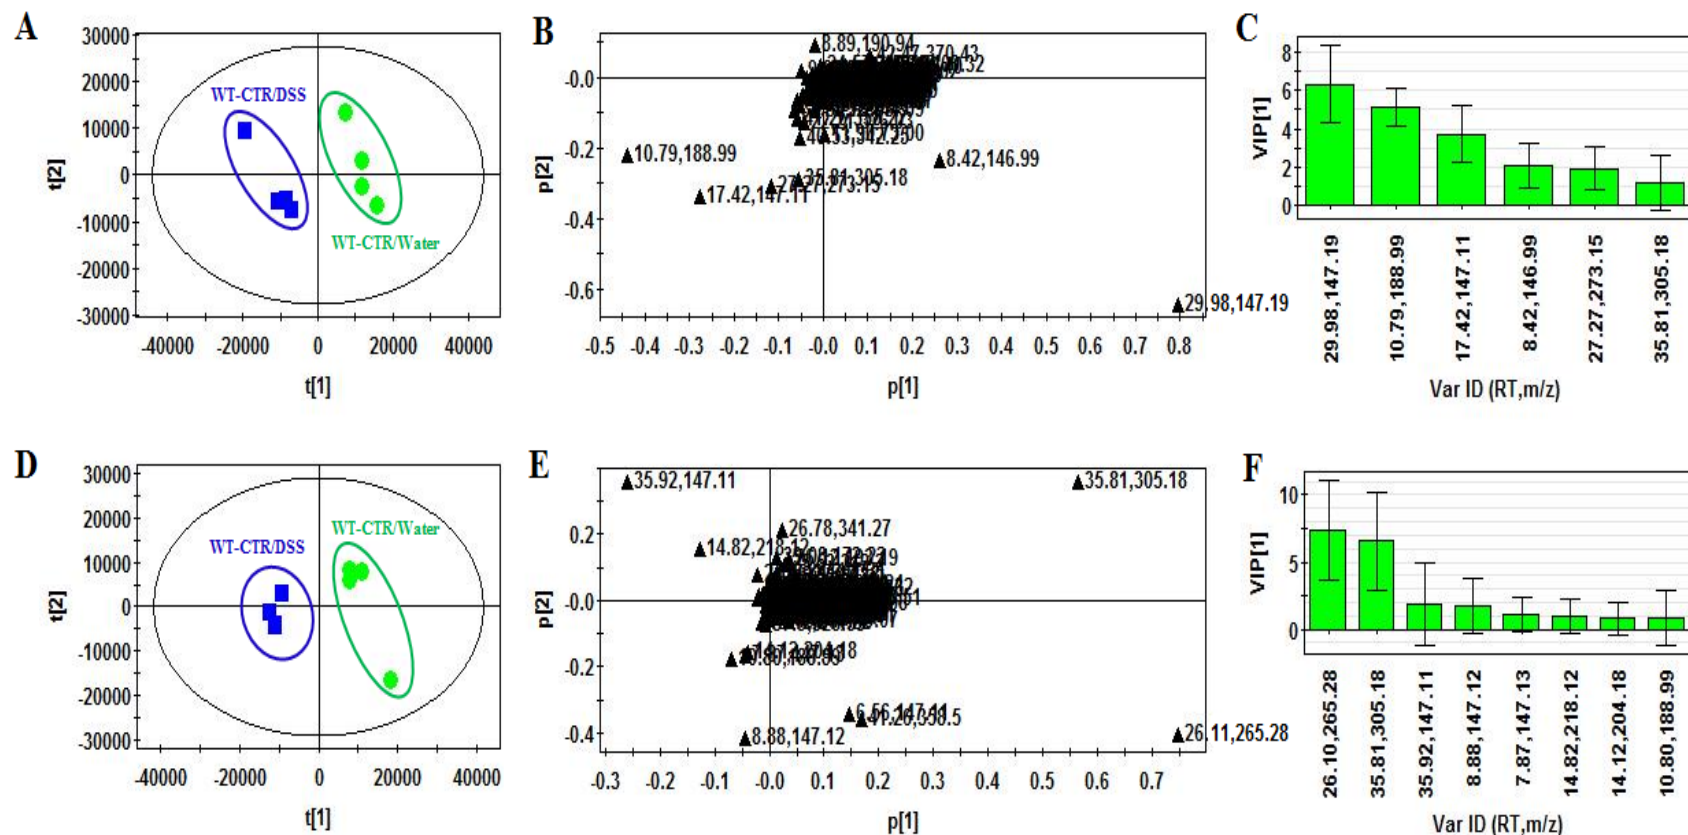

**Figure S1.** PLS-DA models discriminating the control and colitis groups for serum (A-C) and colon (D-F). (A) PLS-DA score plot of the first two latent variables (serum, with the cumulative  $R^2X$  0.617,  $R^2Y$  0.968, and  $Q^2$  0.935); (B) PLS-DA loading plot explaining separation in (A) and the associated VIP plot of the first component highlighting discriminatory metabolite markers (C); (D) PLS-DA score plot of the first two latent variables (colon, with the cumulative  $R^2X$  0.732,  $R^2Y$  0.995, and  $Q^2$  0.958); (E) PLS-DA loading plot explaining separation in (D) and the associated VIP plot of the first component highlighting discriminatory metabolite markers (F).

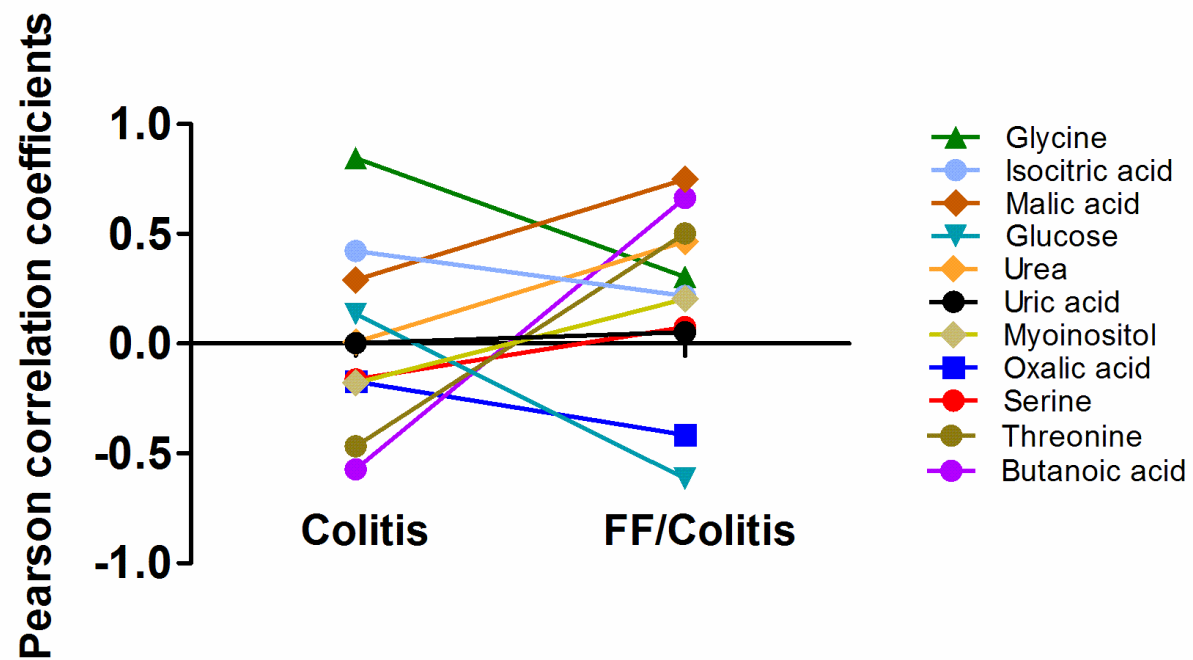

**Figure S2.** Pearson correlation coefficients of the levels of the metabolite markers in serum and colon, for the colitis mice and fenofibrate/DSS-treated WT mice (FF/colitis).

**Table.S1** Body weight changes of the mice in the four examined groups\*

(% Initial body weight, mean±SD, n=4 for each group)

| Days | WT-CTR/Water | WT-CTR/DSS                | WT-FF/DSS                | KO-FF/DSS                 |
|------|--------------|---------------------------|--------------------------|---------------------------|
| 0    | 100.00±0.00  | 100.00±0.00               | 100.00±0.00              | 100.00±0.00               |
| 1    | 101.77±0.21  | 99.12±1.19 <sup>##</sup>  | 97.65±0.64               | 99.19±0.70                |
| 2    | 103.90±0.20  | 100.60±1.20 <sup>##</sup> | 96.20±0.90 <sup>++</sup> | 100.90±0.80 <sup>ΔΔ</sup> |
| 3    | 104.00±0.00  | 98.00±1.00 <sup>##</sup>  | 95.00±1.00 <sup>++</sup> | 99.00±1.00 <sup>ΔΔ</sup>  |
| 4    | 103.85±0.47  | 101.88±1.00 <sup>##</sup> | 95.15±1.40 <sup>++</sup> | 99.77±1.31 <sup>ΔΔ</sup>  |
| 5    | 103.89±0.77  | 98.55±1.49 <sup>##</sup>  | 93.90±1.00 <sup>++</sup> | 95.64±2.26                |
| 6    | 103.99±0.58  | 95.93±1.73 <sup>##</sup>  | 84.09±2.76 <sup>++</sup> | 92.26±2.51 <sup>Δ</sup>   |
| 7    | 104.63±0.63  | 87.17±2.21 <sup>##</sup>  | 77.26±1.73 <sup>++</sup> | 85.81±1.85 <sup>ΔΔ</sup>  |

<sup>##</sup>  $p < 0.01$ , comparing WT-CTR/Water and WT-CTR/DSS groups; <sup>++</sup>  $p < 0.01$ , comparing WT-CTR/DSS and WT-FF/DSS groups;

<sup>ΔΔ</sup>  $p < 0.01$  and <sup>Δ</sup>  $p < 0.05$ , comparing WT-FF/DSS and KO-FF/DSS groups.

\*Figures of these body weight changes could be found in our publication (American Journal of Physiology - Gastrointestinal and Liver Physiology, 2014, 307, G564-G573).

**Table.S2** Metabolic pathway enrichment analysis of the metabolites identified as potential biomarkers

| Pathway name                             | <i>P</i> value | Adj. <i>P</i> value | Hits | Metabolites                             |
|------------------------------------------|----------------|---------------------|------|-----------------------------------------|
| Purine metabolism                        | 0.002800       | 0.017733            | 3    | Uric acid, Glycine, Urea                |
| Glyoxylate and dicarboxylate metabolism  | 0.000322       | 0.005623            | 3    | Malic acid, Isocitric acid, Oxalic acid |
| Aminoacyl-tRNA biosynthesis              | 0.001553       | 0.013644            | 3    | Threonine, Serine, Glycine              |
| Glycine, serine and threonine metabolism | 0.000444       | 0.005623            | 3    | Glycine, Threonine, Serine              |
| Galactose metabolism                     | 0.007462       | 0.028356            | 2    | Glucose, Myoinositol                    |
| Citrate cycle (TCA cycle)                | 0.001795       | 0.013644            | 2    | Isocitric acid, Malic acid              |

*P*-value, statistically assessed against the background set; adj. *p*-value, *p*-value corrected using the false discovery rate.
